# Supplementary material
Source: PubMed Central journal article supplement (PMC4136593)
Supplement: 1412840111_pnas.201412840SI.pdf [file 1412840111_pnas.201412840SI.pdf]

# Supporting Information

Hubbi et al. 10.1073/pnas.1412840111

**Table S1. Nucleotide sequences of primers used for qPCR**

| Primer          | Sequence                 |
|-----------------|--------------------------|
| 18S rRNA-Fwd    | CGGCGACGACCCATTGCAAC     |
| 18S rRNA-Rev    | GAATCGAACCCCTGATTCCCCGTC |
| BNIP3_Mus_Fwd   | ACTCAGATTGGATATGGGATTGG  |
| BNIP3_Mus_Rev   | GAGACAGTAACAGAGATGGAAGG  |
| GLUT1_Human_Fwd | CGGGCCAAGAGTGTGCTAAA     |
| GLUT1_Human_Rev | TGACGATACCGGAGCCAATG     |
| GLUT1_Mus_Fwd   | GCTCTACGTGGAGCCCTA       |
| GLUT1_Mus_Rev   | CACATCGGCTGTCCCTCGA      |
| PDK1_Human_Fwd  | ACCAGGACAGCCAATACAAG     |
| PDK1_Human_Rev  | CCTCGGTCACTCATCTTCAC     |
| VEGF_Human_Fwd  | CTTGCCCTGCTGCTCTAC       |
| VEGF_Human_Rev  | TGGCTTGAAGATGTACTGG      |
| P4HA1_Mus_Fwd   | ACACTGAGTGGAGTGAGTTGG    |
| P4HA1_Mus_Rev   | TTGCAGCCGAAACAGAGCTT     |
| PLOD2_Mus_Fwd   | GAGAGGCGGTGATGGAATGAA    |
| PLOD2_Mus_Rev   | ACTCGGTAAACAAGATGACCAGA  |
| VEGF_Mus_Fwd    | GGCTGCTGTAACGATGAAG      |
| VEGF_Mus_Rev    | CTCTCTATGTGCTGGCTTTG     |
